# Supplementary material for: Correlation of Computed Tomography Parameters with Histology, Stage and Prognosis in Surgically Treated Thymomas
Source: MDPI journal article supplement (doi:10.3390/medicina57010010), 2020-12-24
Supplement: s1 [file s1]

**Supplementary Table 1 - CT scan features**

|                                         |                           |
|-----------------------------------------|---------------------------|
| <b>Total No.</b>                        | <b>50</b>                 |
| Location                                |                           |
| Right                                   | 13 (26%)                  |
| Left                                    | 27 (54%)                  |
| Median                                  | 10 (20%)                  |
| Size ( $\pm$ SD; range)                 |                           |
| Major axis (mm)                         | 59 $\pm$ 26.9; 21-132     |
| Minor axis (mm)                         | 38.7 $\pm$ 20.5; 10-94    |
| Volume (ml)                             | 114.9 $\pm$ 176.9; 3-994  |
| Regular shape                           | 30 (60%)                  |
| Regular contours                        | 19 (38%)                  |
| Necrosis                                | 24 (48%)                  |
| Calcifications                          | 13 (26%)                  |
| Lymphadenopathy                         | 10 (20%)                  |
| Pleural                                 |                           |
| Contact length ( $\pm$ SD; range, mm)   | 68.2 $\pm$ 34.8; 15-175   |
| Effusion                                | 4 (8%)                    |
| Dissemination                           | 2 (4%)                    |
| Pericardial effusion                    | 5 (10%)                   |
| Invasion                                |                           |
| Mediastinal fat                         | 23 (46%)                  |
| Major blood vessels                     | 44 (88%)                  |
| Pericardium                             | 40 (80%)                  |
| Lung                                    | 2 (4%)                    |
| Homogenous contrast enhancement pattern | 11 (32% over 34 patients) |
