# Supplementary material for: Correlation of Computed Tomography Parameters with Histology, Stage and Prognosis in Surgically Treated Thymomas
Source: MDPI journal article supplement (doi:10.3390/medicina57010010), 2020-12-24
Supplement: s1 [file s1]

**Supplementary Table 2 -Correlation of CT parameters and histological classifications**

|                                        |               | WHO       |            |            |           |            | p             | SUSTER AND MORAN    |                           | p             |
|----------------------------------------|---------------|-----------|------------|------------|-----------|------------|---------------|---------------------|---------------------------|---------------|
|                                        |               | A         | AB         | B1         | B2        | B3         |               | Well-differentiated | Moderately-differentiated |               |
| Long axis (median, mm)                 | < 53.5        | 3 (75%)   | 6 (42.9%)  | 5 (45.5%)  | 3 (37.5%) | 8 (61.5%)  | 0.63          | 17 (45.9%)          | 8 (61.5%)                 | 0.33          |
|                                        | > 53.5        | 1 (25%)   | 8 (57.1%)  | 6 (55.5%)  | 5 (62.5%) | 5 (38.5%)  |               | 20 (54.1%)          | 5 (38.5%)                 |               |
| Short axis (median, mm)                | < 36.5        | 2 (50%)   | 7 (50%)    | 6 (54.5%)  | 3 (37.5%) | 7 (53.8%)  | 0.95          | 18 (48.6%)          | 7 (53.8%)                 | 0.75          |
|                                        | > 36.5        | 2 (50%)   | 7 (50%)    | 5 (45.5%)  | 5 (62.5%) | 6 (46.2%)  |               | 19 (51.4%)          | 6 (46.2%)                 |               |
| Volume (median, mm <sup>3</sup> )      | < 60          | 3 (75%)   | 7 (50%)    | 6 (54.5%)  | 2 (25%)   | 7 (53.8%)  | 0.53          | 18 (48.6%)          | 7 (53.8%)                 | 0.75          |
|                                        | > 60          | 1 (25%)   | 7 (50%)    | 5 (45.5%)  | 6 (75%)   | 6 (46.2%)  |               | 19 (51.4%)          | 6 (46.2%)                 |               |
| Length of pleural contact (median, mm) | < 64          | 4 (100%)  | 7 (50%)    | 5 (45.5%)  | 2 (25%)   | 7 (53.8%)  | 0.19          | 18 (48.6%)          | 7 (53.8%)                 | 0.75          |
|                                        | > 64          | 0         | 7 (50%)    | 6 (55.5%)  | 6 (75%)   | 6 (46.2%)  |               | 19 (51.4%)          | 6 (46.2%)                 |               |
| Shape                                  | Oval          | 3 (75%)   | 13 (92.9%) | 6 (54.5%)  | 5 (62.5%) | 3 (23.1%)  | <b>0.007*</b> | 27 (73%)            | 3 (23.1)                  | <b>0.002*</b> |
|                                        | Irregular     | 1 (25%)   | 1 (7.1%)   | 5 (45.5%)  | 3 (37.5%) | 10 (76.9%) |               | 10 (27%)            | 10 (76.9%)                |               |
| Contours                               | Regular       | 2 (50%)   | 9 (64.3%)  | 4 (36.4%)  | 4 (50%)   | 0          | <b>0.012*</b> | 19 (51.4%)          | 0                         | <b>0.001*</b> |
|                                        | Irregular     | 2 (50%)   | 5 (35.7%)  | 7 (63.6%)  | 4 (50%)   | 13 (100%)  |               | 18 (48.6%)          | 13 (100%)                 |               |
| Necrosis                               | Yes           | 2 (50%)   | 6 (42.9%)  | 6 (54.5%)  | 4 (50%)   | 6 (46.2%)  | 0.98          | 18 (48.6%)          | 6 (46.2%)                 | 0.88          |
|                                        | No            | 2 (50%)   | 8 (57.1%)  | 5 (45.5%)  | 4 (50%)   | 7 (53.8%)  |               | 19 (51.4%)          | 7 (53.8%)                 |               |
| Calcifications                         | Yes           | 2 (50%)   | 3 (21.4%)  | 0          | 3 (37.5%) | 5 (38.5%)  | 0.145         | 8 (21.6%)           | 5 (38.5%)                 | 0.23          |
|                                        | No            | 2 (50%)   | 11 (78.6%) | 11 (100%)  | 5 (62.5%) | 8 (61.5%)  |               | 29 (78.4%)          | 8 (61.5%)                 |               |
| Lymph node enlargements                | Yes           | 1 (25%)   | 2 (14.3%)  | 2 (18.2%)  | 3 (37.5%) | 2 (15.4%)  | 0.77          | 8 (21.6%)           | 2 (15.4%)                 | 0.22          |
|                                        | No            | 3 (75%)   | 12 (85.7%) | 9 (81.9%)  | 5 (62.5%) | 11 (84.6%) |               | 29 (78.4%)          | 11 (84.6%)                |               |
| Pleural effusion                       | Yes           | 1 (25%)   | 2 (14.3%)  | 0          | 1 (12.5%) | 0          | 0.33          | 4 (10.6%)           | 0                         | 0.22          |
|                                        | No            | 3 (75%)   | 12 (85.7%) | 11 (100%)  | 7 (87.5%) | 13 (100%)  |               | 33 (89.2%)          | 13 (100%)                 |               |
| Pericardial effusion                   | Yes           | 1 (25%)   | 2 (14.3%)  | 0          | 0         | 2 (15.4%)  | 0.43          | 3 (8.1%)            | 2 (15.4%)                 | 0.45          |
|                                        | No            | 3 (75%)   | 12 (85.7%) | 11 (100%)  | 8 (100%)  | 11 (84.6%) |               | 34 (91.9%)          | 11 (84.6%)                |               |
| Invasion of mediastinal fat            | Yes           | 1 (25%)   | 3 (21.4%)  | 6 (54.5%)  | 4 (50%)   | 9 (69.2%)  | 0.12          | 14 (37.8%)          | 9 (69.2%)                 | 0.051         |
|                                        | No            | 3 (75%)   | 11 (78.6%) | 5 (45.5%)  | 4 (50%)   | 4 (30.8%)  |               | 23 (62.2%)          | 4 (30.8%)                 |               |
| Contact with mediastinal vessels       | Yes           | 3 (75%)   | 11 (78.6%) | 10 (90.9%) | 7 (87.5%) | 13 (100%)  | 0.45          | 31 (83.6%)          | 13 (100%)                 | 0.12          |
|                                        | No            | 1 (25%)   | 3 (21.4%)  | 1 (9.1%)   | 1 (12.5%) | 0          |               | 6 (16.2%)           | 0                         |               |
| Pericardial contact                    | Yes           | 2 (50%)   | 10 (71.4%) | 9 (81.8%)  | 6 (75%)   | 13 (100%)  | 0.18          | 27 (73%)            | 13 (100%)                 | <b>0.036*</b> |
|                                        | No            | 2 (50%)   | 4 (28.6%)  | 2 (18.2%)  | 2 (25%)   | 0          |               | 10 (27%)            | 0                         |               |
| Lung invasion                          | Yes           | 0         | 1 (7.1%)   | 0          | 0         | 1 (7.7%)   | 0.78          | 1 (2.7%)            | 1 (7.7%)                  | 0.43          |
|                                        | No            | 4 (100%)  | 13 (92.9%) | 11 (100%)  | 8 (100%)  | 12 (92.3%) |               | 36 (97.3%)          | 12 (92.3%)                |               |
| Pleural invasion                       | Yes           | 1 (25%)   | 1 (7.1%)   | 0          | 0         | 0          | 0.18          | 2 (5.4%)            | 0                         | 0.39          |
|                                        | No            | 3 (75%)   | 13 (92.9%) | 11 (100%)  | 8 (100%)  | 13 (100%)  |               | 35 (94.6%)          | 13 (100%)                 |               |
| Contrast enhancement diffusion pattern | Homogeneous   | 2 (66.7%) | 2 (25%)    | 3 (37.5%)  | 1 (16.7%) | 3 (33.3%)  | 0.63          | 8 (32%)             | 3 (33.3%)                 | 0.94          |
|                                        | Inhomogeneous | 1 (33.3%) | 6 (75%)    | 5 (62.5%)  | 5 (83.3%) | 6 (66.7%)  |               | 17 (68%)            | 6 (66.%)                  |               |
| Laterality                             | Right         | 0         | 4 (28.6%)  | 4 (36.4%)  | 2 (25%)   | 3 (23.1%)  | 0.07          | 10 (27%)            | 3 (23.1%)                 | <b>0.02*</b>  |
|                                        | Left          | 4 (100%)  | 9 (64.3%)  | 4 (36.4%)  | 6 (75%)   | 4 (30.8%)  |               | 23 (62.2%)          | 4 (30.8%)                 |               |
|                                        | Median        | 0         | 1 (7.1%)   | 3 (27.3%)  | 0         | 6 (46.2%)  |               | 4 (10.8%)           | 6 (46.2%)                 |               |
